# Supplementary material
Source: PubMed Central journal article supplement (PMC10260995)
Supplement: 41598_2023_36144_MOESM2_ESM.pdf [file 41598_2023_36144_MOESM2_ESM.pdf]

TRB repertoire

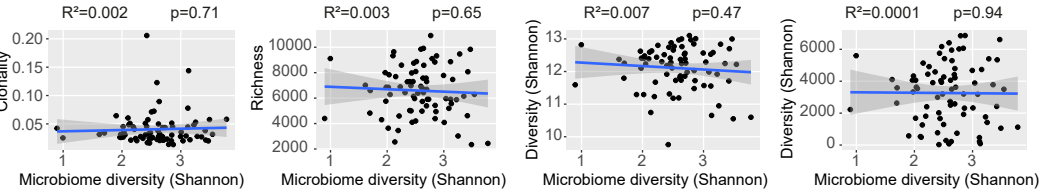

IGH repertoire

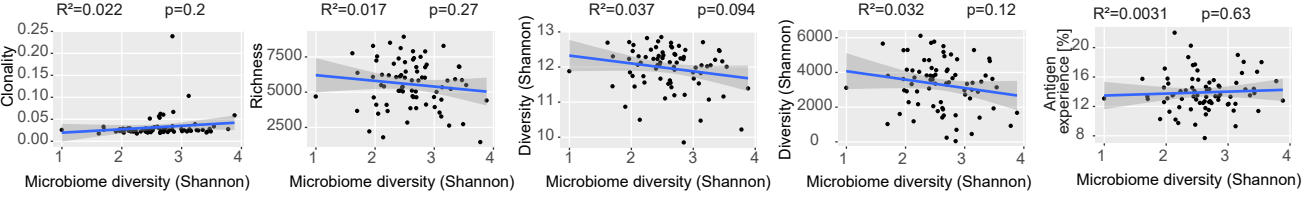

**Supplemental Figure 2:** Correlation of blood B cell metrics with microbiome diversity in LoewenKIDS subcohort. Correlations displayed for TRB and BCR repertoires. Unpaired two-tailed t-test and one-way ANOVA were used as statistical test. Squared Pearson correlation coefficients  $R^2$  are shown.
