# Supplementary material
Source: PubMed Central journal article supplement (PMC10260995)
Supplement: 41598_2023_36144_MOESM3_ESM.pdf [file 41598_2023_36144_MOESM3_ESM.pdf]

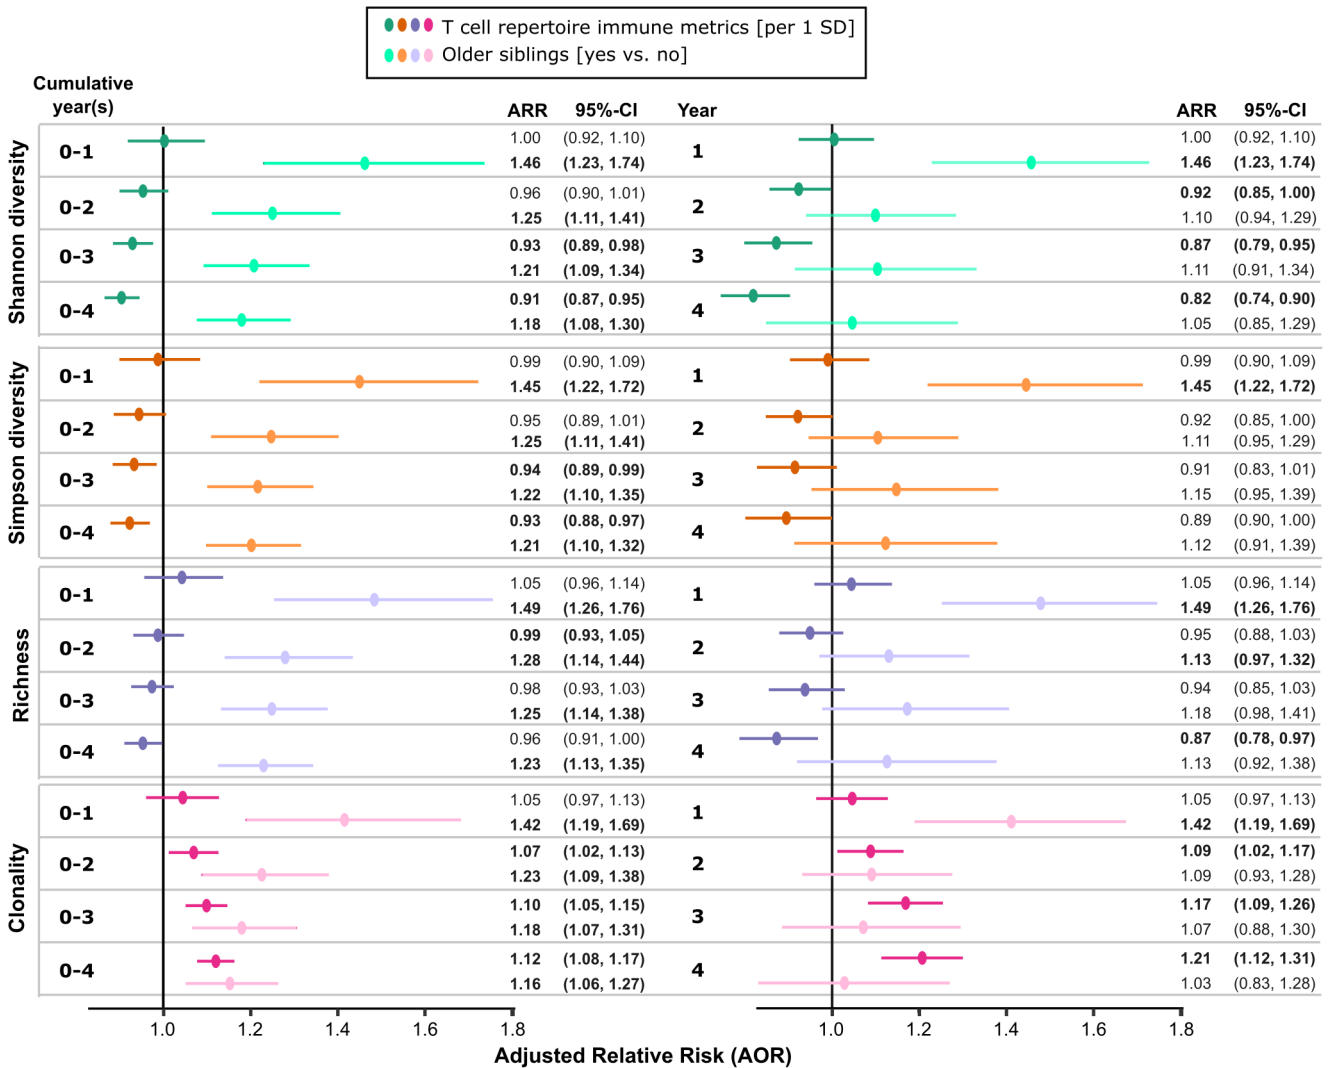

**Supplemental Figure 3:** Poisson regression analysis of the cumulative number of ARI at the age of 1, 2, 3, and 4 years and in the respective years alone. Separate models show the association for each T cell repertoire immune metric (Shannon diversity, Simpson diversity, richness, clonality) in comparison with the effect of having older siblings, while mutually adjusting within each time frame or year (n=67). Estimates and 95% confidence intervals are shown.
